# Supplementary figures and images for: A fast and adaptive detection framework for genome-wide chromatin loop mapping from Hi-C data
Source: HighWire-hosted journal article supplement (doi:10.1101/gr.279274.124), 2024-08-13

Pileup of 40732 loops pileup

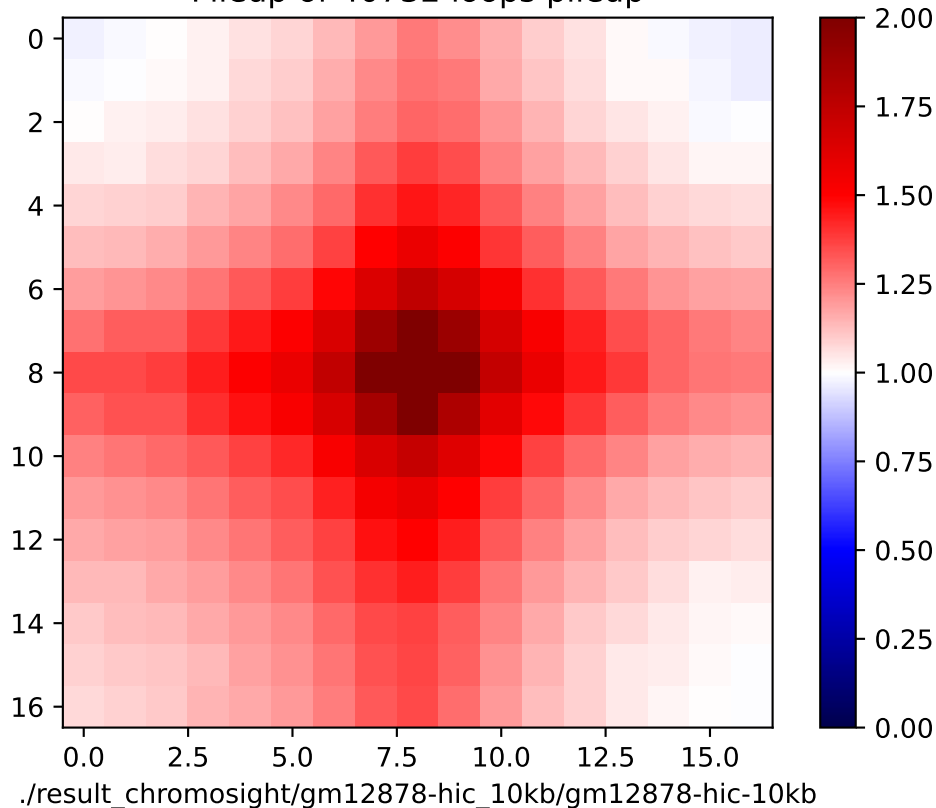

Supplement: Supplemental_Code.zip [file gm12878-hic_10kb.pdf › code/reproducibility/benchmarks/chromosight/gm12878-hic_10kb/gm12878-hic_10kb.pdf]
